# Supplementary material for: Chronic kidney disease is associated with attenuated plasma metabolome response to oral glucose tolerance testing
Source: bioRxiv or medRxiv preprint supplement (doi:10.1101/2022.01.08.22268946), 2022-01-10
Supplement: Supplementary file [file media-1.pdf]

## Supplemental Figures

**Supplemental table 1.** Differences in plasma metabolites in response to glucose load compared to fasting. Results are from a regression SERRF normalized metabolites on sample type (OGTT vs fasting) adjusted for age, sex, race, weight, and batch. A p-value of <0.05 was used to determine significance (in bold). The fold change in response to oral glucose is the adjusted fold change associated with OGTT compared to fasting state (e.g., a fold change of 1.28 indicates a 28% increase in metabolite levels).

| Metabolite Name        | Fold change<br>between<br>OGTT/fasting<br>(%95 CI) | p-value        |
|------------------------|----------------------------------------------------|----------------|
| Hippuric acid          | 3.28 (2.28, 4.73)                                  | < <b>0.001</b> |
| Erythrose              | 1.53 (1.2, 1.94)                                   | < <b>0.001</b> |
| Glycochenodeoxycholate | 1.52 (0.94, 2.45)                                  | 0.089          |
| Glycocholate           | 1.39 (0.94, 2.07)                                  | 0.1            |
| Glucose                | 1.28 (1.17, 1.39)                                  | < <b>0.001</b> |
| Kynurenate             | 1.17 (1.04, 1.31)                                  | <b>0.0076</b>  |
| Creatine               | 1.16 (1.02, 1.32)                                  | <b>0.022</b>   |
| lactate                | 1.13 (0.98, 1.3)                                   | 0.091          |
| Xanthine               | 1.11 (0.99, 1.24)                                  | 0.063          |
| Cystamine              | 1.11 (0.91, 1.35)                                  | 0.29           |
| Glucuronate            | 1.09 (0.95, 1.25)                                  | 0.24           |
| Pyruvate               | 1.09 (0.92, 1.29)                                  | 0.31           |
| Pyridoxal-5-P          | 1.04 (0.88, 1.24)                                  | 0.64           |
| Aminoisobutyrate       | 1.03 (0.94, 1.14)                                  | 0.52           |
| Carnitine              | 1.02 (0.96, 1.08)                                  | 0.58           |
| L-Kynurenine           | 1.02 (0.93, 1.12)                                  | 0.67           |
| Trimethylamine         | 1.01 (0.94, 1.07)                                  | 0.88           |
| Betaine                | 1.01 (0.93, 1.1)                                   | 0.77           |
| Urate                  | 1 (0.95, 1.05)                                     | 0.9            |
| 5-Hydroxytryptophan    | 0.99 (0.94, 1.04)                                  | 0.73           |
| Oxalic acid            | 0.99 (0.86, 1.13)                                  | 0.83           |
| Uridine                | 0.97 (0.79, 1.19)                                  | 0.78           |
| F16BP                  | 0.95 (0.91, 1)                                     | <b>0.03</b>    |

|                   |                   |                   |
|-------------------|-------------------|-------------------|
| Inositol          | 0.95 (0.91, 0.98) | <b>0.0028</b>     |
| Cystine           | 0.95 (0.88, 1.02) | 0.14              |
| Choline           | 0.95 (0.87, 1.04) | 0.29              |
| 1-Methyladenosine | 0.94 (0.89, 0.99) | <b>0.026</b>      |
| Hypoxanthine      | 0.94 (0.83, 1.07) | 0.36              |
| Glycerate         | 0.94 (0.8, 1.1)   | 0.41              |
| Fumaric acid      | 0.92 (0.83, 1.02) | 0.12              |
| Biotin            | 0.92 (0.82, 1.03) | 0.14              |
| Dimethylglycine   | 0.92 (0.79, 1.06) | 0.25              |
| Citraconic acid   | 0.92 (0.74, 1.14) | 0.46              |
| GTP               | 0.91 (0.87, 0.96) | <b>&lt; 0.001</b> |
| Creatinine        | 0.91 (0.87, 0.96) | <b>&lt; 0.001</b> |
| Propionate        | 0.91 (0.77, 1.08) | 0.27              |
| Allantoin         | 0.9 (0.81, 1)     | <b>0.049</b>      |
| Alanine           | 0.88 (0.81, 0.96) | <b>0.005</b>      |
| Chenodeoxycholate | 0.88 (0.81, 0.96) | <b>0.0037</b>     |
| Homovanilate      | 0.88 (0.77, 1)    | 0.058             |
| Glutamine         | 0.87 (0.81, 0.93) | <b>&lt; 0.001</b> |
| D-Leucic acid     | 0.87 (0.72, 1.06) | 0.17              |
| G6P               | 0.86 (0.81, 0.92) | <b>&lt; 0.001</b> |
| Melatonin         | 0.86 (0.67, 1.11) | 0.25              |
| Lysine            | 0.85 (0.8, 0.91)  | <b>&lt; 0.001</b> |
| Shikimic acid     | 0.85 (0.74, 0.99) | <b>0.032</b>      |
| Histidine         | 0.84 (0.79, 0.88) | <b>&lt; 0.001</b> |
| Adipic acid       | 0.84 (0.72, 0.96) | <b>0.014</b>      |
| TMAO              | 0.84 (0.6, 1.16)  | 0.29              |
| Glycine           | 0.83 (0.77, 0.9)  | <b>&lt; 0.001</b> |
| Pentothenate      | 0.83 (0.73, 0.94) | <b>0.0036</b>     |
| Oxaloacetate      | 0.81 (0.74, 0.89) | <b>&lt; 0.001</b> |
| GDP               | 0.8 (0.74, 0.88)  | <b>&lt; 0.001</b> |
| Tryptophan        | 0.78 (0.73, 0.84) | <b>&lt; 0.001</b> |
| Aconitate         | 0.78 (0.72, 0.84) | <b>&lt; 0.001</b> |
| Glyceraldehyde    | 0.78 (0.69, 0.9)  | <b>&lt; 0.001</b> |
| Oxypurinol        | 0.78 (0.67, 0.9)  | <b>&lt; 0.001</b> |

|                    |                   |                |
|--------------------|-------------------|----------------|
| Proline            | 0.77 (0.72, 0.83) | < <b>0.001</b> |
| Asparagine         | 0.75 (0.71, 0.79) | < <b>0.001</b> |
| Arginine           | 0.75 (0.66, 0.85) | < <b>0.001</b> |
| Valine             | 0.74 (0.69, 0.8)  | < <b>0.001</b> |
| Ornithine          | 0.74 (0.68, 0.82) | < <b>0.001</b> |
| Threonine          | 0.74 (0.68, 0.8)  | < <b>0.001</b> |
| Phenylalanine      | 0.73 (0.69, 0.77) | < <b>0.001</b> |
| Guanidinoacetate   | 0.73 (0.66, 0.8)  | < <b>0.001</b> |
| N-AcetylGlycine    | 0.73 (0.64, 0.83) | < <b>0.001</b> |
| Hydroxyproline     | 0.73 (0.61, 0.88) | < <b>0.001</b> |
| MethylSuccinate    | 0.72 (0.67, 0.78) | < <b>0.001</b> |
| Serine             | 0.71 (0.66, 0.76) | < <b>0.001</b> |
| IMP                | 0.71 (0.47, 1.07) | 0.098          |
| 2-Hydroxyglutarate | 0.7 (0.62, 0.78)  | < <b>0.001</b> |
| Glutamic acid      | 0.7 (0.6, 0.82)   | < <b>0.001</b> |
| Cystathionine      | 0.7 (0.59, 0.84)  | < <b>0.001</b> |
| Methionine         | 0.67 (0.62, 0.71) | < <b>0.001</b> |
| Sorbitol           | 0.66 (0.6, 0.72)  | < <b>0.001</b> |
| Tyrosine           | 0.65 (0.61, 0.69) | < <b>0.001</b> |
| Succinate          | 0.61 (0.55, 0.68) | < <b>0.001</b> |
| PGE                | 0.6 (0.53, 0.69)  | < <b>0.001</b> |
| Citrulline         | 0.58 (0.53, 0.62) | < <b>0.001</b> |
| Leucine            | 0.56 (0.51, 0.61) | < <b>0.001</b> |
| iso-Leucine        | 0.55 (0.5, 0.6)   | < <b>0.001</b> |
| Adenylosuccinate   | 0.53 (0.44, 0.65) | < <b>0.001</b> |
| Aspartic acid      | 0.51 (0.43, 0.6)  | < <b>0.001</b> |
| Taurine            | 0.49 (0.41, 0.58) | < <b>0.001</b> |
| Malonic acid       | 0.38 (0.28, 0.51) | < <b>0.001</b> |
| Niacinamide        | 0.37 (0.29, 0.48) | < <b>0.001</b> |
| ADP                | 0.21 (0.14, 0.32) | < <b>0.001</b> |
| Linolenic acid     | 0.18 (0.15, 0.21) | < <b>0.001</b> |

**Supplemental table 2.** Differences in plasma metabolic response post glucose challenge by CKD status. Result from regression analysis using SERFF normalized on sample type (fasting vs OGTT) by CKD status adjusted for age, sex, race, weight, and batch. Fold changes represent changes in metabolite levels with fasting levels after glucose load. (e.g. a fold change of 0.92 indicates a reduction of %8 in metabolite level. P-value for interaction represents the heterogeneity in fold change by disease status.

| <b>Metabolite name</b> | <b>Fold change between OGTT/fasting for Non-CKD (%95 CI)</b> | <b>Fold change between OGTT/fasting for CKD (%95 CI)</b> | <b>p-value for interaction</b> |
|------------------------|--------------------------------------------------------------|----------------------------------------------------------|--------------------------------|
| Succinate              | 0.48 (0.37, 0.62)                                            | 0.78 (0.71, 0.85)                                        | < 0.001                        |
| Taurine                | 0.41 (0.28, 0.6)                                             | 0.75 (0.66, 0.85)                                        | 0.0032                         |
| Adenylosuccinate       | 0.41 (0.26, 0.65)                                            | 0.84 (0.72, 0.98)                                        | 0.0037                         |
| Hippuric acid          | 1.56 (0.67, 3.59)                                            | 5.68 (4.29, 7.54)                                        | 0.004                          |
| ADP                    | 0.17 (0.07, 0.42)                                            | 0.63 (0.47, 0.86)                                        | 0.0063                         |
| Biotin                 | 0.74 (0.59, 0.93)                                            | 1.02 (0.94, 1.1)                                         | 0.011                          |
| Niacinamide            | 0.35 (0.2, 0.6)                                              | 0.7 (0.58, 0.84)                                         | 0.019                          |
| Glycochenodeoxycholate | 0.47 (0.16, 1.35)                                            | 1.69 (1.18, 2.42)                                        | 0.025                          |
| Inositol               | 0.92 (0.85, 0.99)                                            | 1 (0.98, 1.03)                                           | 0.026                          |
| Kynurenate             | 1.07 (0.82, 1.4)                                             | 0.78 (0.71, 0.85)                                        | 0.026                          |
| IMP                    | 0.18 (0.07, 0.48)                                            | 0.55 (0.39, 0.76)                                        | 0.037                          |
| Uridine                | 0.69 (0.49, 0.96)                                            | 0.99 (0.89, 1.11)                                        | 0.043                          |
| Glucose                | 1.07 (0.88, 1.31)                                            | 1.34 (1.25, 1.43)                                        | 0.043                          |
| GDP                    | 0.73 (0.59, 0.89)                                            | 0.9 (0.84, 0.97)                                         | 0.05                           |
| Melatonin              | 0.48 (0.28, 0.84)                                            | 0.83 (0.69, 1)                                           | 0.067                          |
| Glycocholate           | 0.7 (0.29, 1.66)                                             | 1.61 (1.2, 2.15)                                         | 0.073                          |
| 2-Hydroxyglutarate     | 0.57 (0.43, 0.76)                                            | 0.73 (0.67, 0.8)                                         | 0.1                            |
| iso-Leucine            | 0.49 (0.4, 0.59)                                             | 0.58 (0.54, 0.61)                                        | 0.12                           |
| Urate                  | 1.06 (1.02, 1.1)                                             | 1.03 (1.01, 1.04)                                        | 0.12                           |
| D-Leucic.Acid          | 0.68 (0.44, 1.04)                                            | 0.96 (0.83, 1.11)                                        | 0.13                           |
| Creatinine             | 0.87 (0.78, 0.97)                                            | 0.95 (0.91, 0.98)                                        | 0.15                           |
| Aspartic.Acid          | 0.63 (0.47, 0.83)                                            | 0.78 (0.71, 0.86)                                        | 0.15                           |
| 1-Methyladenosine      | 0.89 (0.81, 0.99)                                            | 0.97 (0.94, 1.01)                                        | 0.15                           |
| Guanidinoacetate       | 0.67 (0.54, 0.82)                                            | 0.78 (0.73, 0.83)                                        | 0.15                           |
| Pentothenate           | 0.72 (0.54, 0.96)                                            | 0.9 (0.81, 0.99)                                         | 0.17                           |
| Glycerate              | 0.75 (0.5, 1.11)                                             | 0.99 (0.87, 1.14)                                        | 0.18                           |

|                                |                   |                   |      |
|--------------------------------|-------------------|-------------------|------|
| Aconitate                      | 0.83 (0.69, 1)    | 0.95 (0.9, 1.02)  | 0.18 |
| Pyridoxal-5-P                  | 0.82 (0.56, 1.18) | 1.07 (0.94, 1.21) | 0.18 |
| Trimethylamine-N-oxide.(TMAO)  | 0.41 (0.19, 0.87) | 0.69 (0.54, 0.9)  | 0.2  |
| F16BP/F26BP/G16BP              | 0.92 (0.84, 1.02) | 0.99 (0.96, 1.02) | 0.2  |
| Citraconic.Acid                | 1.29 (0.78, 2.13) | 0.92 (0.78, 1.09) | 0.21 |
| Erythrose                      | 1.45 (0.89, 2.37) | 1.04 (0.89, 1.23) | 0.21 |
| Glutamic.acid                  | 0.59 (0.44, 0.79) | 0.72 (0.65, 0.79) | 0.22 |
| Leucine                        | 0.51 (0.42, 0.62) | 0.57 (0.54, 0.61) | 0.28 |
| Glutaric.Acid/Oxaloacetate     | 0.87 (0.72, 1.05) | 0.97 (0.91, 1.03) | 0.28 |
| Aminoisobutyrate               | 1.04 (0.83, 1.29) | 0.92 (0.86, 0.99) | 0.32 |
| Proline                        | 0.77 (0.66, 0.9)  | 0.84 (0.79, 0.88) | 0.32 |
| Hydroxyproline/Aminolevulinate | 0.64 (0.42, 0.98) | 0.79 (0.69, 0.92) | 0.34 |
| Pyruvate                       | 1.08 (0.71, 1.64) | 1.34 (1.16, 1.54) | 0.34 |
| Serine                         | 0.75 (0.64, 0.89) | 0.82 (0.77, 0.87) | 0.37 |
| Cystamine                      | 1.09 (0.74, 1.6)  | 0.9 (0.79, 1.03)  | 0.38 |
| L-Kynurenine                   | 1.09 (0.9, 1.32)  | 0.99 (0.93, 1.06) | 0.38 |
| Arginine                       | 0.72 (0.53, 0.99) | 0.84 (0.75, 0.93) | 0.39 |
| Adipic.Acid                    | 1.04 (0.75, 1.43) | 0.89 (0.8, 0.99)  | 0.39 |
| Valine                         | 0.7 (0.61, 0.82)  | 0.75 (0.72, 0.79) | 0.4  |
| Carnitine                      | 0.97 (0.84, 1.11) | 1.02 (0.98, 1.07) | 0.42 |
| Phenylalanine                  | 0.74 (0.66, 0.84) | 0.78 (0.75, 0.81) | 0.42 |
| Asparagine                     | 0.75 (0.67, 0.84) | 0.79 (0.76, 0.82) | 0.44 |
| Glyceraldehyde                 | 0.8 (0.59, 1.07)  | 0.9 (0.81, 1)     | 0.44 |
| Chenodeoxycholate              | 0.94 (0.79, 1.12) | 0.88 (0.82, 0.93) | 0.45 |
| Citrulline                     | 0.63 (0.53, 0.74) | 0.67 (0.63, 0.71) | 0.48 |
| Shikimic.Acid                  | 1.17 (0.89, 1.55) | 1.06 (0.96, 1.16) | 0.49 |
| Hypoxanthine                   | 0.92 (0.7, 1.21)  | 1.01 (0.92, 1.11) | 0.52 |
| Linolenic.Acid                 | 0.23 (0.17, 0.32) | 0.26 (0.23, 0.29) | 0.52 |
| 5-Hydroxytryptophan            | 1.06 (0.97, 1.15) | 1.03 (1, 1.06)    | 0.54 |
| GTP                            | 0.95 (0.86, 1.05) | 0.98 (0.95, 1.02) | 0.54 |
| Glycine                        | 0.8 (0.67, 0.94)  | 0.84 (0.79, 0.89) | 0.56 |
| Oxypurinol                     | 0.63 (0.44, 0.9)  | 0.7 (0.62, 0.79)  | 0.6  |
| Xanthine                       | 0.92 (0.71, 1.19) | 0.99 (0.9, 1.08)  | 0.61 |
| Cystathionine                  | 0.9 (0.66, 1.23)  | 0.82 (0.74, 0.92) | 0.61 |

|                            |                   |                   |      |
|----------------------------|-------------------|-------------------|------|
| Dimethylglycine            | 0.79 (0.58, 1.06) | 0.85 (0.77, 0.95) | 0.62 |
| Glutamine                  | 0.92 (0.77, 1.09) | 0.88 (0.83, 0.93) | 0.62 |
| N-AcetylGlycine            | 0.71 (0.52, 0.96) | 0.77 (0.69, 0.85) | 0.62 |
| Betaine                    | 1.01 (0.84, 1.2)  | 0.96 (0.9, 1.02)  | 0.63 |
| Tyrosine                   | 0.68 (0.59, 0.78) | 0.7 (0.67, 0.74)  | 0.63 |
| Lysine                     | 0.83 (0.72, 0.96) | 0.86 (0.82, 0.9)  | 0.64 |
| Oxalic.Acid                | 1.26 (0.91, 1.74) | 1.16 (1.04, 1.29) | 0.64 |
| Methionine                 | 0.67 (0.58, 0.78) | 0.7 (0.66, 0.73)  | 0.65 |
| Alanine                    | 0.89 (0.72, 1.11) | 0.94 (0.87, 1.01) | 0.67 |
| Threonine                  | 0.78 (0.67, 0.91) | 0.75 (0.72, 0.79) | 0.69 |
| Malonic Acid               | 0.95 (0.63, 1.43) | 1.04 (0.9, 1.19)  | 0.69 |
| Histidine                  | 0.86 (0.76, 0.96) | 0.84 (0.8, 0.87)  | 0.7  |
| MethylSuccinate            | 0.76 (0.64, 0.89) | 0.78 (0.74, 0.82) | 0.73 |
| Homovanilate               | 0.98 (0.74, 1.29) | 0.93 (0.85, 1.02) | 0.73 |
| Kuraridinol                | 1.07 (0.84, 1.37) | 1.02 (0.95, 1.1)  | 0.74 |
| Creatine                   | 1.14 (0.85, 1.53) | 1.08 (0.98, 1.2)  | 0.75 |
| Trimethylamine (TMA)       | 1.04 (0.9, 1.21)  | 1.06 (1.01, 1.12) | 0.78 |
| Propionate                 | 0.83 (0.58, 1.19) | 0.79 (0.7, 0.89)  | 0.78 |
| Sorbitol                   | 0.67 (0.55, 0.8)  | 0.68 (0.64, 0.73) | 0.8  |
| lactate                    | 1.15 (0.82, 1.61) | 1.2 (1.08, 1.35)  | 0.81 |
| Allantoin                  | 0.93 (0.76, 1.14) | 0.95 (0.89, 1.02) | 0.81 |
| Choline                    | 0.98 (0.78, 1.22) | 0.95 (0.88, 1.03) | 0.83 |
| Fumaric.Acid/Maleic.Acid   | 0.95 (0.77, 1.19) | 0.94 (0.87, 1.01) | 0.89 |
| PGE                        | 0.75 (0.59, 0.96) | 0.77 (0.71, 0.83) | 0.89 |
| Glycochenodeoxycholic.acid | 0.83 (0.07, 9.83) | 0.7 (0.34, 1.44)  | 0.9  |
| Ornithine                  | 0.77 (0.62, 0.97) | 0.76 (0.71, 0.82) | 0.92 |
| G1P/G6P/F6P/F1P            | 0.95 (0.85, 1.06) | 0.95 (0.91, 0.98) | 0.94 |
| Glucuronate                | 0.92 (0.7, 1.22)  | 0.92 (0.84, 1.01) | 0.98 |
| Cystine                    | 0.98 (0.83, 1.14) | 0.98 (0.93, 1.03) | 0.99 |
| Tryptophan                 | 0.86 (0.73, 1.01) | 0.86 (0.81, 0.91) | 1    |

**Supplemental table 3.** The list of metabolites in each module from the WGCNA analysis.

| <b>Module color</b> | <b>Metabolite name</b> |
|---------------------|------------------------|
| black               | Alanine                |
| black               | Pyruvate               |
| black               | lactate                |
| black               | Oxalic.Acid            |
| blue                | Glycine                |
| blue                | Aminoisobutyrate       |
| blue                | Choline                |
| blue                | Serine                 |
| blue                | Asparagine             |
| blue                | Phenylalanine          |
| blue                | Arginine               |
| blue                | MethylSuccinate        |
| blue                | Citrulline             |
| blue                | G1P.G6P.F6P.F1P        |
| blue                | Prostaglandin E        |
| brown               | TMAO                   |
| brown               | Dimethylglycine        |
| brown               | Proline                |
| brown               | Threonine              |
| brown               | Hydroxyproline         |
| brown               | Glutamine              |
| brown               | Propionate             |
| brown               | Hyppuric acid          |
| brown               | Linolenic acid         |
| green               | Malonic acid           |
| green               | D-Leucic acid          |
| green               | Urate                  |
| green               | Inositol               |
| green               | Kynurenate             |
| green               | IMP                    |
| grey                | Trimethylamine         |

|      |                     |
|------|---------------------|
| grey | Creatinine          |
| grey | Betaine             |
| grey | Creatine            |
| grey | Glutamic acid       |
| grey | Carnitine           |
| grey | 13C-Arginine        |
| grey | 13C-Tyrosine        |
| grey | L-Kynurenine        |
| grey | 5-Hydroxytryptophan |
| grey | Cystine             |
| grey | Uridine             |
| grey | 1-Methyladenosine   |
| grey | Glyceraldehyde      |
| grey | C13-Lactate         |
| grey | Glycerate           |
| grey | N-AcetylGlycine     |
| grey | Citraconic acid     |
| grey | Hypoxanthine        |
| grey | Adipic acid         |
| grey | 2-Hydroxyglutarate  |
| grey | Oxypurinol          |
| grey | Xanthine            |
| grey | Allantoin           |
| grey | Shikimic acid       |
| grey | Aconitate           |
| grey | Glucose             |
| grey | 13C-Glucose         |
| grey | Glucuronate         |
| grey | Pentothenate        |
| grey | Cystathionine       |
| grey | Melatonin           |
| grey | Biotin              |
| grey | Pyridoxal-5-P       |
| grey | F16BP.F26BP.G16BP   |



|           |                        |
|-----------|------------------------|
| grey      | Chenodeoxycholate      |
| grey      | Glycochenodeoxycholate |
| grey      | Glycocholate           |
| grey      | GTP                    |
| red       | Fumaric acid           |
| red       | Glutaric acid          |
| red       | Homovanilate           |
| red       | Erythrose              |
| turquoise | Valine                 |
| turquoise | Leucine                |
| turquoise | Iso-Leucine            |
| turquoise | Ornithine              |
| turquoise | Lysine                 |
| turquoise | Methionine             |
| turquoise | Cystamine              |
| turquoise | Histidine              |
| turquoise | Tyrosine               |
| turquoise | Sorbitol               |
| turquoise | Tryptophan             |
| turquoise | Guanidinoacetate       |
| yellow    | Niacinamide            |
| yellow    | Taurine                |
| yellow    | Aspartic acid          |
| yellow    | Succinate              |
| yellow    | ADP                    |
| yellow    | GDP                    |
| yellow    | Adenylosuccinate       |
